# Supplementary material
Source: Copernicus journal article supplement (doi:10.5194/bg-23-4361-2026)
Supplement: Supplementary file 1 [file bg-23-4361-2026-supplement.pdf]

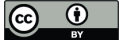

*Supplement of*

## **Evaluation of the particulate inorganic carbon export efficiency in the global ocean**

**Jordan Toullec**

*Correspondence to:* Jordan Toullec ([toullec.jordan@gmail.com](mailto:toullec.jordan@gmail.com))

The copyright of individual parts of the supplement might differ from the article licence.

**Table S1:** Satellite products merged in the analyses. AV = Simple average method; AVW = Weighted average method; SWF = Sea-Viewing Wide Field of View Sensor (SeaWiFS); MOD = Moderate Resolution Imaging Spectrometer (MODIS); VIR = Visible Infrared Imaging Radiometer Suite (VIIRS); MER = Medium Resolution Imaging Spectrometer (MERIS); OLA = Ocean and Land Colour Instruments (Sentinel-3A); Vj1 = VIIRS aboard JPSS-1 (Joint Polar Satellite System); OLB = Ocean and Land Colour Instruments (Sentinel-3B).

| Periods                | Monthly PIC concentration | Monthly SST                                 | Monthly PAR                                 | Monthly $K_d_{490nm}$ |
|------------------------|---------------------------|---------------------------------------------|---------------------------------------------|-----------------------|
|                        | mol C m <sup>-3</sup>     | °C                                          | mol photons m <sup>-2</sup> d <sup>-1</sup> | m <sup>-1</sup>       |
| Sept 1997- April 2002  | AV-SWF                    | ESA SST CCI and C3S and C3S reprocessed SST | AV-SWF                                      | AV-SWF                |
| May 2002- June 2002    | AV-SWF                    | ESA SST CCI and C3S reprocessed SST         | AV-SWF                                      | AVW-MERSWF            |
| July - 2002 - Dec 2010 | AVW-MODSWF                | MODIS                                       | AVW-MODSWF                                  | AVW-MERMODSWF         |
| Jan- 2011 - Jan 2012   | AV-MOD                    | MODIS                                       | AV-MOD                                      | AVW-MERMOD            |
| Febr - 2012 - Apr 2012 | AVW-MODVIR                | MODIS                                       | AVW-MODVIR                                  | AVW-MERMODVIR         |
| May - 2012 - Apr 2016  | AVW-MODVIR                | MODIS                                       | AVW-MODVIR                                  | AVW-MODVIR            |
| May 2016 - Nov 2017    | AVW-MODVIR                | MODIS                                       | AVW-MODVIR                                  | AVW-MODVIR            |
| Dec 2017 - Mar 2019    | AVW-MODVIR                | MODIS                                       | AVW-MODVIR                                  | AVW-MODVIR            |
| Apr 2019 - Oct 2023    | AVW-MODVIR                | MODIS                                       | AVW-MODVIR                                  | AVW-MODVIR            |

5

**Table S2:** PIC flux dataset compilation.

| Data sets                                                                                                                                                               | Reference                  |
|-------------------------------------------------------------------------------------------------------------------------------------------------------------------------|----------------------------|
| <a href="https://doi.org/10.1594/PANGAEA.855600">https://doi.org/10.1594/PANGAEA.855600</a>                                                                             | Mouw et al., 2016          |
| <a href="https://doi.org/10.1594/PANGAEA.807946">https://doi.org/10.1594/PANGAEA.807946</a>                                                                             | Torres Valdés et al., 2014 |
| Supplementary material: <a href="https://agupubs.onlinelibrary.wiley.com/doi/10.1002/2014GL061678">https://agupubs.onlinelibrary.wiley.com/doi/10.1002/2014GL061678</a> | Le Moigne et al., 2014     |
| <a href="https://doi.org/10.1594/PANGAEA.934361">https://doi.org/10.1594/PANGAEA.934361</a>                                                                             | Fischer et al., 2016       |
| <a href="https://doi.org/10.1594/PANGAEA.867116">https://doi.org/10.1594/PANGAEA.867116</a>                                                                             | Romero et al., 2016        |
| <a href="https://doi.org/10.1594/PANGAEA.863969">https://doi.org/10.1594/PANGAEA.863969</a>                                                                             | Rosengard et al., 2015     |
| Table 2                                                                                                                                                                 | Neukermans et al., 2023    |
| Table 1                                                                                                                                                                 |                            |

**Table S3:** Number of observations per RECCAP2 biogeochemical regions and layer of depth used in the analysis.

| Regions             | Number of PIC observation | Number of stations | Depth layer | Number of PIC observation |
|---------------------|---------------------------|--------------------|-------------|---------------------------|
| Arctic (Ar)         | 83                        | 4                  | 0-100m      | 1                         |
|                     |                           |                    | 100-500m    | 62                        |
|                     |                           |                    | 1000-2000m  | 20                        |
| North Atlantic (NA) | 1170                      | 79                 | 0-100m      | 39                        |
|                     |                           |                    | 100-500m    | 172                       |
|                     |                           |                    | 1000-2000m  | 202                       |
|                     |                           |                    | 2000-3000m  | 444                       |
|                     |                           |                    | 3000-4000m  | 78                        |
|                     |                           |                    | 500-1000m   | 143                       |

|                                  |     |    |            |     |
|----------------------------------|-----|----|------------|-----|
|                                  |     |    | > 4000m    | 92  |
| North Pacific (NP)               | 963 | 17 | 0-100m     | 3   |
|                                  |     |    | 100-500m   | 229 |
|                                  |     |    | 1000-2000m | 135 |
|                                  |     |    | 2000-3000m | 89  |
|                                  |     |    | 3000-4000m | 169 |
|                                  |     |    | 500-1000m  | 104 |
|                                  |     |    | > 4000m    | 234 |
| North Subtropics Atlantic (NSTA) | 670 | 12 | 0-100m     | 7   |
|                                  |     |    | 1000-2000m | 173 |
|                                  |     |    | 2000-3000m | 240 |
|                                  |     |    | 3000-4000m | 22  |
|                                  |     |    | 500-1000m  | 156 |
|                                  |     |    | > 4000m    | 72  |
| North Subtropics Pacific (NSTP)  | 662 | 11 | 100-500m   | 342 |
|                                  |     |    | 1000-2000m | 103 |
|                                  |     |    | 2000-3000m | 102 |
|                                  |     |    | 3000-4000m | 36  |
|                                  |     |    | > 4000m    | 79  |
| North Indian (NI)                | 939 | 16 | 1000-2000m | 150 |
|                                  |     |    | 2000-3000m | 197 |
|                                  |     |    | 3000-4000m | 201 |
|                                  |     |    | 500-1000m  | 391 |
| Equatorial Atlantic (EA)         | 41  | 3  | 0-100m     | 2   |
|                                  |     |    | 3000-4000m | 19  |
|                                  |     |    | 500-1000m  | 20  |
| Equatorial Pacific (EP)          | 329 | 8  | 1000-2000m | 63  |
|                                  |     |    | 2000-3000m | 125 |
|                                  |     |    | 3000-4000m | 78  |
|                                  |     |    | 500-1000m  | 42  |
|                                  |     |    | > 4000m    | 21  |
|                                  | 180 | 12 | 0-100m     | 4   |
| South Subtropics Atlantic (SSTA) |     |    | 1000-2000m | 96  |
|                                  |     |    | 2000-3000m | 20  |
|                                  |     |    | 500-1000m  | 60  |
| South Subtropics Pacific (SSTP)  | 337 | 9  | 1000-2000m | 106 |
|                                  |     |    | 2000-3000m | 132 |
|                                  |     |    | 3000-4000m | 78  |
|                                  |     |    | > 4000m    | 21  |
| Subantarctic (SAZ)               | 21  | 21 | 0-100m     | 9   |
|                                  |     |    | 100-500m   | 12  |
|                                  | 608 | 62 | 0-100m     | 24  |
|                                  |     |    | 100-500m   | 179 |
| Antarctic (AAZ)                  |     |    | 1000-2000m | 106 |
|                                  |     |    | 2000-3000m | 56  |
|                                  |     |    | 3000-4000m | 49  |
|                                  |     |    | 500-1000m  | 140 |

**Table S4:** Statistical parameter associated with the linear regression between EZ PIC production and log<sub>10</sub> transformed PIC flux for each layer of depth and per RECCAP2 biogeochemical regions.

| Region                           | Depth             | Slope         | Slope $\sigma$ | Intercept     | Intercept $\sigma$ | Pearson R coefficient | Pearson R coefficient $\sigma$ | R <sup>2</sup> | p-value          | n          |
|----------------------------------|-------------------|---------------|----------------|---------------|--------------------|-----------------------|--------------------------------|----------------|------------------|------------|
| Arctic Ar                        | na                | na            | na             | na            | na                 | na                    | na                             | na             | na               | na         |
| North Atlantic (NA)              | 0-100m            | 0.109         | 0.574          | 44.591        | 13.233             | 0.03                  | 0.152                          | 0.001          | 0.85             | 43         |
|                                  | <b>100-500m</b>   | <b>1.042</b>  | <b>0.084</b>   | <b>-0.838</b> | <b>0.492</b>       | <b>0.785</b>          | <b>0.039</b>                   | <b>0.616</b>   | <b>&lt;0.001</b> | <b>97</b>  |
|                                  | <b>500-1000m</b>  | <b>0.412</b>  | <b>0.065</b>   | <b>0.295</b>  | <b>0.618</b>       | <b>0.591</b>          | <b>0.075</b>                   | <b>0.35</b>    | <b>&lt;0.001</b> | <b>76</b>  |
|                                  | <b>1000-2000m</b> | <b>0.218</b>  | <b>0.046</b>   | <b>1.678</b>  | <b>0.556</b>       | <b>0.423</b>          | <b>0.08</b>                    | <b>0.179</b>   | <b>&lt;0.001</b> | <b>105</b> |
|                                  | <b>2000-3000m</b> | <b>0.237</b>  | <b>0.026</b>   | <b>1.857</b>  | <b>0.332</b>       | <b>0.448</b>          | <b>0.044</b>                   | <b>0.201</b>   | <b>&lt;0.001</b> | <b>334</b> |
|                                  | <b>3000-4000m</b> | <b>0.515</b>  | <b>0.033</b>   | <b>-1.01</b>  | <b>0.428</b>       | <b>0.874</b>          | <b>0.027</b>                   | <b>0.763</b>   | <b>&lt;0.001</b> | <b>78</b>  |
|                                  | <b>&gt;4000m</b>  | <b>0.222</b>  | <b>0.049</b>   | <b>2.851</b>  | <b>0.793</b>       | <b>0.43</b>           | <b>0.085</b>                   | <b>0.185</b>   | <b>&lt;0.001</b> | <b>92</b>  |
| North Pacific (NP)               | 0-100m            | -0.501        | 1.481          | 1.222         | 0.356              | -0.959                | 0.046                          | 0.92           | 0.183            | 3          |
|                                  | <b>100-500m</b>   | <b>0.246</b>  | <b>0.089</b>   | <b>8.747</b>  | <b>0.826</b>       | <b>0.199</b>          | <b>0.07</b>                    | <b>0.04</b>    | <b>0.006</b>     | <b>188</b> |
|                                  | 500-1000m         | 0.007         | 0.029          | 2.133         | 0.332              | 0.029                 | 0.115                          | 0.001          | 0.803            | 76         |
|                                  | 1000-2000m        | 0.068         | 0.036          | 3.696         | 0.513              | 0.219                 | 0.112                          | 0.048          | 0.064            | 72         |
|                                  | 2000-3000m        | -0.007        | 0.048          | 4.354         | 0.569              | -0.02                 | 0.136                          | 0              | 0.887            | 54         |
|                                  | 3000-4000m        | -0.036        | 0.035          | 3.453         | 0.294              | -0.102                | 0.099                          | 0.011          | 0.313            | 99         |
|                                  | >4000m            | 0.004         | 0.014          | 3.342         | 0.202              | 0.023                 | 0.07                           | 0.001          | 0.744            | 206        |
| North Subtropics Atlantic (NSTA) | 0-100m            | 3.124         | 2.968          | -33.919       | 51.986             | 0.466                 | 0.32                           | 0.217          | 0.352            | 6          |
|                                  | <b>500-1000m</b>  | <b>-0.452</b> | <b>0.088</b>   | <b>12.683</b> | <b>1.521</b>       | <b>-0.384</b>         | <b>0.068</b>                   | <b>0.148</b>   | <b>&lt;0.001</b> | <b>155</b> |
|                                  | <b>1000-2000m</b> | <b>-0.199</b> | <b>0.033</b>   | <b>8.747</b>  | <b>0.67</b>        | <b>-0.431</b>         | <b>0.065</b>                   | <b>0.186</b>   | <b>&lt;0.001</b> | <b>158</b> |
|                                  | <b>2000-3000m</b> | <b>-0.257</b> | <b>0.047</b>   | <b>10.387</b> | <b>0.895</b>       | <b>-0.336</b>         | <b>0.057</b>                   | <b>0.113</b>   | <b>&lt;0.001</b> | <b>240</b> |
|                                  | 3000-4000m        | -0.069        | 0.048          | 10.64         | 1.04               | -0.304                | 0.194                          | 0.092          | 0.169            | 22         |
|                                  | <b>&gt;4000m</b>  | <b>-0.098</b> | <b>0.027</b>   | <b>6.649</b>  | <b>0.683</b>       | <b>-0.399</b>         | <b>0.099</b>                   | <b>0.159</b>   | <b>0.001</b>     | <b>72</b>  |
| North Subtropics Pacific (NSTP)  | <b>100-500m</b>   | <b>-0.269</b> | <b>0.042</b>   | <b>8.707</b>  | <b>0.649</b>       | <b>-0.338</b>         | <b>0.049</b>                   | <b>0.114</b>   | <b>&lt;0.001</b> | <b>324</b> |
|                                  | <b>1000-2000m</b> | <b>0.155</b>  | <b>0.056</b>   | <b>2.418</b>  | <b>0.803</b>       | <b>0.267</b>          | <b>0.093</b>                   | <b>0.071</b>   | <b>0.007</b>     | <b>100</b> |
|                                  | 2000-3000m        | -0.052        | 0.045          | 3.206         | 0.715              | -0.116                | 0.098                          | 0.014          | 0.244            | 102        |
|                                  | <b>3000-4000m</b> | <b>-0.175</b> | <b>0.08</b>    | <b>5.611</b>  | <b>1.318</b>       | <b>-0.354</b>         | <b>0.148</b>                   | <b>0.125</b>   | <b>0.037</b>     | <b>35</b>  |
|                                  | >4000m            | 0.096         | 0.063          | 0.992         | 0.803              | 0.171                 | 0.109                          | 0.029          | 0.132            | 79         |
| North Indian (NI)                | 500-1000m         | 0.543         | 0.061          | 4.623         | 0.58               | 0.417                 | 0.043                          | 0.174          | <b>&lt;0.001</b> | 377        |
|                                  | 1000-2000m        | 0.683         | 0.12           | 4.964         | 1.124              | 0.425                 | 0.067                          | 0.181          | <b>&lt;0.001</b> | 150        |
|                                  | 2000-3000m        | 0.395         | 0.087          | 5.895         | 0.678              | 0.31                  | 0.065                          | 0.096          | <b>&lt;0.001</b> | 196        |
|                                  | 3000-4000m        | 0.419         | 0.078          | 5.367         | 0.666              | 0.358                 | 0.062                          | 0.128          | <b>&lt;0.001</b> | 200        |
| Equatorial Atlantic (EA)         | 500-1000m         | -0.127        | 0.197          | 5.808         | 1.813              | -0.15                 | 0.219                          | 0.022          | 0.528            | 20         |
|                                  | 3000-4000m        | -0.269        | 0.225          | 8.937         | 2.111              | -0.278                | 0.212                          | 0.077          | 0.249            | 19         |
| Equatorial Pacific (EP)          | 500-1000m         | -0.227        | 0.354          | 9.358         | 3.872              | -0.101                | 0.153                          | 0.01           | 0.525            | 42         |
|                                  | 1000-2000m        | 0.129         | 0.065          | 3.277         | 0.743              | 0.248                 | 0.12                           | 0.062          | 0.054            | 61         |
|                                  | 2000-3000m        | -0.195        | 0.106          | 8.882         | 1.301              | -0.164                | 0.087                          | 0.027          | 0.068            | 125        |
|                                  | 3000-4000m        | -0.178        | 0.17           | 8.657         | 1.885              | -0.119                | 0.112                          | 0.014          | 0.299            | 78         |
|                                  | >4000m            | 0.253         | 0.361          | 2.152         | 1.309              | 0.159                 | 0.213                          | 0.025          | 0.492            | 21         |
| South Subtropics Atlantic (SSTA) | 0-100m            | 0.14          | 0.344          | 4.308         | 7.683              | 0.276                 | 0.462                          | 0.076          | 0.724            | 4          |
|                                  | 500-1000m         | 0.046         | 0.032          | 8.906         | 1.213              | 0.189                 | 0.124                          | 0.036          | 0.148            | 60         |

|                                 |                   |               |              |              |              |               |              |              |                  |            |
|---------------------------------|-------------------|---------------|--------------|--------------|--------------|---------------|--------------|--------------|------------------|------------|
|                                 | 1000-2000m        | -0.004        | 0.03         | 7.724        | 0.829        | -0.013        | 0.102        | 0            | 0.9              | 96         |
|                                 | 2000-3000m        | 0.021         | 0.086        | 6.638        | 1.794        | 0.057         | 0.223        | 0.003        | 0.81             | 20         |
| South Subtropics Pacific (SSTP) | <b>1000-2000m</b> | <b>-0.187</b> | <b>0.043</b> | <b>5.587</b> | <b>0.501</b> | <b>-0.392</b> | <b>0.082</b> | <b>0.153</b> | <b>&lt;0.001</b> | <b>106</b> |
|                                 | 2000-3000m        | 0             | 0.042        | 4.918        | 0.545        | 0             | 0.087        | 0            | 0.998            | 132        |
|                                 | <b>3000-4000m</b> | <b>-0.116</b> | <b>0.049</b> | <b>5.29</b>  | <b>0.722</b> | <b>-0.266</b> | <b>0.107</b> | <b>0.071</b> | <b>0.02</b>      | <b>76</b>  |
|                                 | >4000m            | 0.71          | 1.146        | 1.457        | 4.037        | 0.141         | 0.214        | 0.02         | 0.543            | 21         |
| South Indian Ocean (SI)         | n.a               | n.a           | n.a          | n.a          | n.a          | n.a           | n.a          | n.a          | n.a              | 0          |
| Subantarctic (SAZ)              | 0-100m            | -0.272        | 0.775        | 41.71        | 23.086       | -0.132        | 0.328        | 0.017        | 0.736            | 9          |
|                                 | 100-500m          | -0.229        | 0.474        | 21.056       | 15.639       | -0.151        | 0.282        | 0.023        | 0.64             | 12         |
| Antarctic (AAZ)                 | 0-100m            | 2.689         | 6.401        | 78.012       | 46.542       | 0.101         | 0.227        | 0.01         | 0.68             | 19         |
|                                 | <b>100-500m</b>   | <b>1.456</b>  | <b>0.585</b> | <b>4.13</b>  | <b>5.71</b>  | <b>0.54</b>   | <b>0.172</b> | <b>0.292</b> | <b>0.025</b>     | <b>17</b>  |
|                                 | 500-1000m         | -0.085        | 0.09         | 4.607        | 0.948        | -0.115        | 0.121        | 0.013        | 0.353            | 67         |
|                                 | <b>1000-2000m</b> | <b>0.916</b>  | <b>0.286</b> | <b>2.955</b> | <b>2.711</b> | <b>0.505</b>  | <b>0.132</b> | <b>0.255</b> | <b>0.003</b>     | <b>32</b>  |
|                                 | 3000-4000m        | 0.667         | 0.377        | 0.655        | 2.035        | 0.416         | 0.201        | 0.173        | 0.097            | 17         |
|                                 | >4000m            | 0.308         | 0.164        | 2.719        | 1.208        | 0.295         | 0.146        | 0.087        | 0.069            | 39         |

## References

- 15 Fischer, G., Karstensen, J., Romero, O., Baumann, K.-H., Donner, B., Hefter, J., Mollenhauer, G., Iversen, M., Fiedler, B., Monteiro, I., and Körtzinger, A.: Bathypelagic particle flux signatures from a suboxic eddy in the oligotrophic tropical North Atlantic: production, sedimentation and preservation, *Biogeosciences*, 13, 3203–3223, <https://doi.org/10.5194/bg-13-3203-2016>, 2016.
- 20 Le Moigne, F. A. C., Pabortsava, K., Marcinko, C. L. J., Martin, P., and Sanders, R. J.: Where is mineral ballast important for surface export of particulate organic carbon in the ocean?, *Geophys. Res. Lett.*, 41, 8460–8468, <https://doi.org/10.1002/2014GL061678>, 2014.
- Mouw, C. B., Barnett, A., McKinley, G. A., Gloege, L., and Pilcher, D.: Global ocean particulate organic carbon flux merged with satellite parameters, *Earth Syst. Sci. Data*, 8, 531–541, <https://doi.org/10.5194/essd-8-531-2016>, 2016.
- Romero, O. E., Fischer, G., Karstensen, J., and Cermeño, P.: Eddies as trigger for diatom productivity in the openocean Northeast Atlantic, *Prog. Oceanogr.*, 147, 38–48, <https://doi.org/10.1016/j.pocean.2016.07.011>, 2016.
- 25 Neukermans, G., Bach, L. T., Butterley, A., Sun, Q., Claustre, H., and Fournier, G. R.: Quantitative and mechanistic understanding of the open ocean carbonate pump – perspectives for remote 70 sensing and autonomous in situ observation, *Earth-Sci. Rev.*, 104359, <https://doi.org/10.1016/j.earscirev.2023.104359>, 2023.
- 30 Rosengard, S. Z., Lam, P. J., Balch, W. M., Auro, M. E., Pike, S., Drapeau, D., and Bowler, B.: Carbon export and transfer to depth across the Southern Ocean Great Calcite Belt, *Biogeosciences*, 12, 3953–3971, <https://doi.org/10.5194/bg-12-3953-2015>, 2015.
- Torres Valdés, S., Painter, S. C., Martin, A. P., Sanders, R., and Felden, J.: Data compilation of fluxes of sedimenting material from sediment traps in the Atlantic Ocean, *Earth Syst. Sci. Data*, 6, 123–145, <https://doi.org/10.5194/essd-6-123-2014>, 2014.
